# Supplementary material for: RNAseq Analysis Highlights Specific Transcriptome Signatures of Yeast and Mycelial Growth Phases in the Dutch Elm Disease Fungus Ophiostoma novo-ulmi
Source: PubMed Central journal article supplement (PMC4632067; doi:10.1534/g3.115.021022), 2015-09-17
Supplement: supp_g3.115.021022_FigureS2.pdf [file supp_g3.115.021022_FigureS2.pdf]

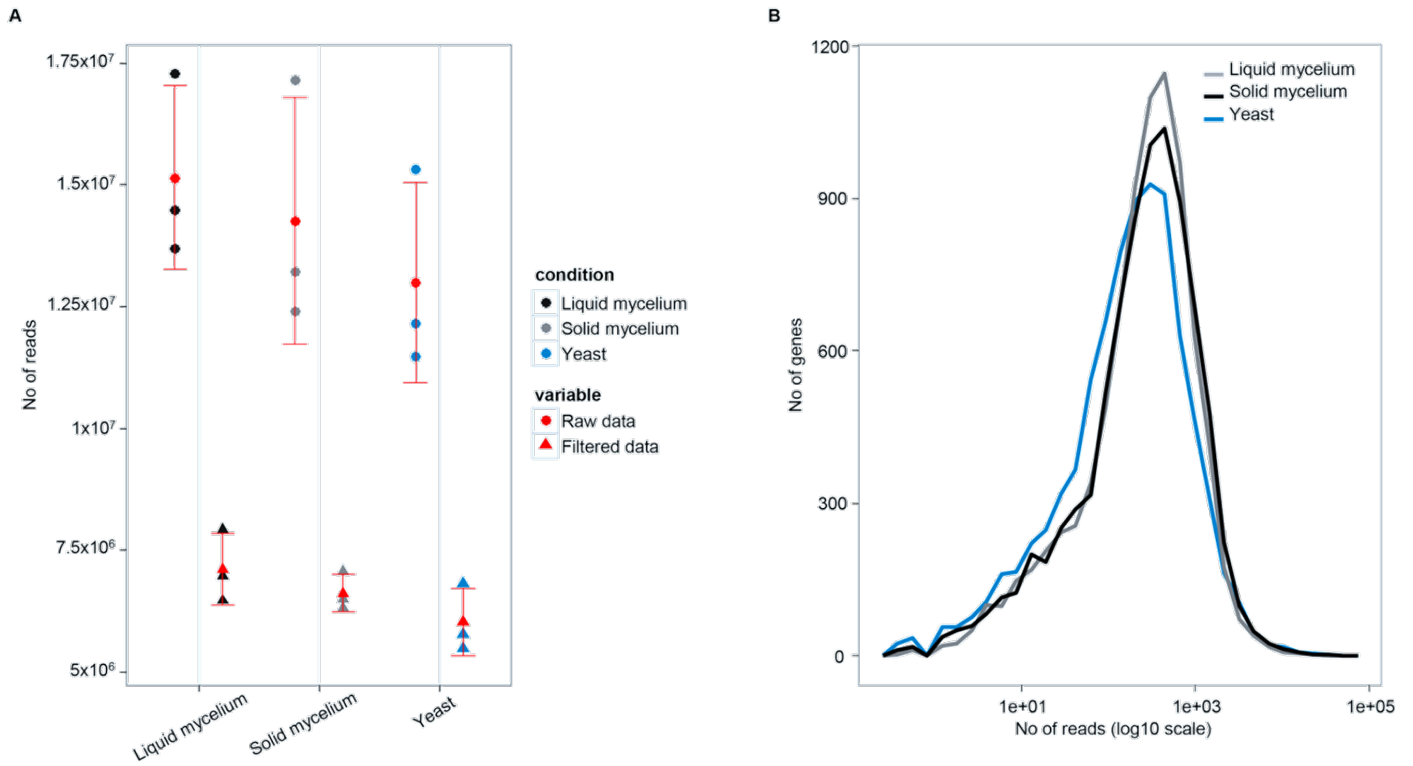

**Figure S2** Number of *Ophiostoma novo-ulmi* RNAseq reads per sample and per gene: (A) Number of reads before (raw reads, dot) and after filtration/cleaning (filtered reads without duplicates, triangle) process present in each of the three conditions. Red dots: means of the three repetitions with standard deviation. No significant differences between conditions for each variable (Fisher's exact test). (B) Distribution of the number of reads (log<sub>10</sub> scale) per genes, per conditions (mean of three replicates).
