# Supplementary material for: RNAseq Analysis Highlights Specific Transcriptome Signatures of Yeast and Mycelial Growth Phases in the Dutch Elm Disease Fungus Ophiostoma novo-ulmi
Source: PubMed Central journal article supplement (PMC4632067; doi:10.1534/g3.115.021022), 2015-09-17
Supplement: supp_g3.115.021022_FigureS3.pdf [file supp_g3.115.021022_FigureS3.pdf]

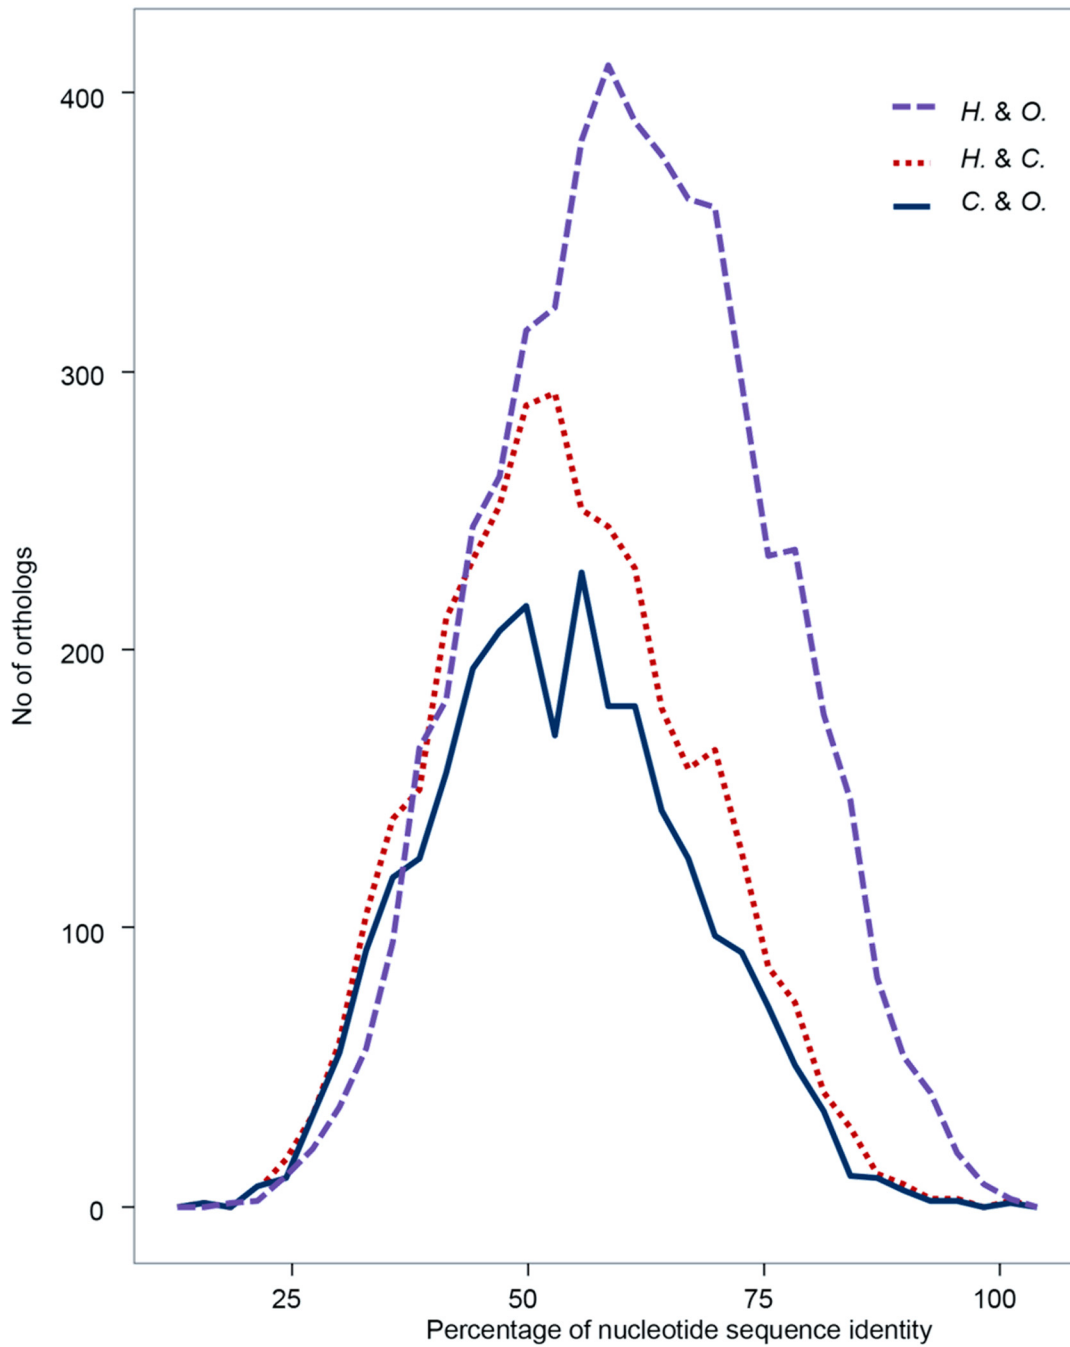

**Figure S3** Distribution of the number of orthologs between two species per percentage of gene sequence identity. *H.*: *Histoplasma capsulatum*; *C.*: *Candida albicans*; *O.*: *Ophiostoma novo-ulmi*
