# Supplementary material for: RNAseq Analysis Highlights Specific Transcriptome Signatures of Yeast and Mycelial Growth Phases in the Dutch Elm Disease Fungus Ophiostoma novo-ulmi
Source: PubMed Central journal article supplement (PMC4632067; doi:10.1534/g3.115.021022), 2015-09-17
Supplement: supp_g3.115.021022_TableS3.pdf [file supp_g3.115.021022_TableS3.pdf]

**Table S3** Number of orthologous genes found with the reciprocal best blast hits (RBH) method compared with the Inparanoid method of Khoshraftar *et al.* (2013). The number of genes in each species is indicated between parentheses.

| Species compared (no of genes)                                 | RBH method | Khoshraftar <i>et al.</i> 2013 |
|----------------------------------------------------------------|------------|--------------------------------|
| <i>Ophiostoma ulmi</i> (8639)/ <i>Neurospora crassa</i> (9730) | 6276       | 5517                           |
| <i>O. ulmi</i> / <i>Saccharomyces cerevisiae</i> (6604)        | 3179       | 2483                           |
| <i>O. ulmi</i> / <i>O. novo-ulmi</i> (8640)                    | 8220       | NA <sup>a</sup>                |
| <i>O. novo-ulmi</i> / <i>N. crassa</i>                         | 6360       | NA                             |
| <i>O. novo-ulmi</i> / <i>S. cerevisiae</i>                     | 3260       | NA                             |
| <i>O. novo-ulmi</i> / <i>Sporothrix schenckii</i> (8674)       | 7171       | NA                             |
| <i>O. novo-ulmi</i> / <i>Candida albicans</i> (6218)           | 2774       | NA                             |
| <i>O. novo-ulmi</i> / <i>Histoplasma capsulatum</i> (9233)     | 5292       | NA                             |
| <i>H. capsulatum</i> / <i>C. albicans</i>                      | 3391       | NA                             |

<sup>a</sup> NA : data Not Available
